# Supplementary material for: Nasal Nitric Oxide in Chronic Rhinosinusitis with or without Nasal Polyps: A Systematic Review with Meta-Analysis
Source: PubMed Central journal article supplement (PMC7020063; doi:10.3390/jcm9010200), 2020-01-11
Supplement: jcm-09-00200-s001.pdf [file jcm-09-00200-s001.pdf]

## Supplementary online material

### **Nasal nitric oxide in chronic rhinosinusitis with or without nasal polyps: a systematic review with meta-analysis.**

Pasquale Ambrosino <sup>1</sup>, Antonio Molino <sup>2</sup>, Giorgio Alfredo Spedicato <sup>3</sup>, Paolo Parrella <sup>1</sup>, Roberto Formisano <sup>1</sup>, Andrea Motta <sup>4</sup>, Matteo Nicola Dario Di Minno <sup>5</sup>, Mauro Maniscalco <sup>1</sup>

<sup>1</sup>Cardio-pulmonary Rehabilitation Dept, Istituti Clinici Scientifici Maugeri IRCCS, Telese Terme, Italy;

<sup>2</sup>Respiratory Division, Department of Respiratory Medicine, Federico II University, Naples, Italy.

<sup>3</sup>University of Bologna, Bologna, Italy

<sup>4</sup>Institute of Biomolecular Chemistry, National Research Council, 80078 Pozzuoli (Naples), Italy.

<sup>5</sup>Department of Translational Medical Sciences, Federico II University, Naples, Italy;

#### Table of contents:

|                       |                                                                                                                                                                                                                                                                   |
|-----------------------|-------------------------------------------------------------------------------------------------------------------------------------------------------------------------------------------------------------------------------------------------------------------|
| Supplemental Table 1  | Devices and methods for measurement of nasal nitric oxide (nNO) in included studies.                                                                                                                                                                              |
| Supplemental Table 2  | Assessment of quality of studies (Newcastle-Ottawa scale).                                                                                                                                                                                                        |
| Supplemental Table 3  | Meta-regression analyses. Impact of major clinical and demographic variables on nasal nitric oxide (nNO) in cases and control subjects.                                                                                                                           |
| Supplemental Figure 1 | Funnel plot of effect size vs. precision (1/standard error) for studies evaluating nasal nitric oxide (nNO) in patients with chronic rhinosinusitis with nasal polyps (CRSwNP) and healthy controls.                                                              |
| Supplemental Figure 2 | Funnel plot of effect size vs. precision (1/standard error) for studies evaluating nasal nitric oxide (nNO) in patients with chronic rhinosinusitis without nasal polyps (CRSsNP) and healthy controls.                                                           |
| Supplemental Figure 3 | Funnel plot of effect size vs. precision (1/standard error) for studies evaluating nasal nitric oxide (nNO) in patients with chronic rhinosinusitis with nasal polyps (CRSwNP) and in control subjects with chronic rhinosinusitis without nasal polyps (CRSsNP). |

**Supplemental Table 1. Devices and methods for measurement of nasal nitric oxide (nNO) in included studies.**

| Study              | Analyzer          | Technique                                       | Transnasal airflow | Device      | Equipment                                                             |
|--------------------|-------------------|-------------------------------------------------|--------------------|-------------|-----------------------------------------------------------------------|
| Alexandersson 2019 | Chemiluminescence | Aspiration during breath hold                   | 2000 ml/min        | Nasal olive | ▪ NIOX®, Aerocrine AB (Solna,Sweden)                                  |
| Arnal 1999         | Chemiluminescence | Aspiration during tidal breath                  | 700 ml/min         | Nasal olive | ▪ NO analyser, Cosma (Igny, France)                                   |
| Asano 2008         | Chemiluminescence | Nasal exhalation                                | 3000 ml/min        | Nasal olive | ▪ Sievers NOA-280i®, GE Analytical Instruments (Boulder, USA)         |
| Bae 2014           | Electrochemical   | Nasal exhalation                                | -                  | -           | ▪ NObreath®, Bedfont Scientific (Rochester, UK)                       |
| Bommarito 2008     | Chemiluminescence | Aspiration during breath hold                   | 300 ml/min         | Nasal olive | ▪ NIOX®, Aerocrine AB (Solna,Sweden)                                  |
| Frendø 2018        | Electrochemical   | Aspiration during exhalation against resistance | 300 ml/min         | Nasal olive | ▪ NIOX MINO Airway Inflammation Monitor®, Aerocrine AB (Solna,Sweden) |
| Fu 2015            | Electrochemical   | Aspiration during tidal breath                  | 300 ml/min         | Nasal olive | ▪ NIOX MINO Airway Inflammation Monitor®, Aerocrine AB (Solna,Sweden) |
| Fu 2017            | Electrochemical   | Aspiration during tidal breath                  | 300 ml/min         | Nasal olive | ▪ NIOX MINO Airway Inflammation Monitor®, Aerocrine AB (Solna,Sweden) |
| Gilain 2002        | Chemiluminescence | Aspiration during exhalation against resistance | 3000 ml/min        | Nasal olive | ▪ Sievers NOA-280i®, GE Analytical Instruments (Boulder, USA)         |
| Guilemany 2009     | Chemiluminescence | Aspiration during breath hold                   | 3000 ml/min        | Nasal olive | ▪ SIR System N6008 NO tracer®, SIR (Madrid, Spain)                    |
| Gupta 2013         | Electrochemical   | -                                               | 300 ml/min         | Nasal olive | ▪ NIOX MINO Airway Inflammation Monitor®, Aerocrine AB (Solna,Sweden) |
| Heffler 2013       | Chemiluminescence | Aspiration during breath hold                   | 300 ml/min         | Nasal olive | ▪ NIOX®, Aerocrine AB (Solna,Sweden)                                  |
| Jeong 2014         | Chemiluminescence | Aspiration during exhalation against resistance | 700 ml/min         | Nasal olive | ▪ Sievers NOA-280i®, GE Analytical Instruments (Boulder, USA)         |
| Lee 2015           | Chemiluminescence | Aspiration during exhalation against resistance | 300 ml/min         | Nasal olive | ▪ Eco Medics CLD 88sp NO Analyzer®, Eco Physics Inc. (Ann Arbor, USA) |
| Lindenberg 1997    | Chemiluminescence | Aspiration during tidal breath                  | 660 ml/min         | Nasal olive | ▪ CLD 700 AL Med®, Ecophysics (Durnten, Switzerland)                  |
| Liu 2017           | Electrochemical   | Aspiration during exhalation against resistance | 2500-3000 ml/min   | Nasal olive | ▪ NIOX MINO Airway Inflammation Monitor®, Aerocrine AB (Solna,Sweden) |
| Noda 2012          | Electrochemical   | Nasal exhalation                                | 3000 ml/min        | Nasal olive | ▪ NObreath®, Bedfont Scientific (Rochester, UK)                       |
| Ragab 2006         | Chemiluminescence | Aspiration during breath hold                   | 250 ml/min         | Nasal olive | ▪ LR 2000®, Logan Sinclair (Rochester, UK)                            |

|                 |                   |                                                 |             |             |                                                                       |
|-----------------|-------------------|-------------------------------------------------|-------------|-------------|-----------------------------------------------------------------------|
| Torretta 2015   | -                 | -                                               | -           | -           | ▪ -                                                                   |
| Tworek 2012     | Electrochemical   | -                                               | -           | Nasal olive | ▪ ExpAir®, Medisoft (Dinant, Belgium)                                 |
| Weschta 2008    | Electrochemical   | Nasal exhalation                                | 3000 ml/min | Nasal mask  | ▪ NIOX MINO Airway Inflammation Monitor®, Aerocrine AB (Solna,Sweden) |
| Williamson 2010 | Chemiluminescence | Aspiration during exhalation against resistance | -           | Nasal olive | ▪ NIOX®, Aerocrine AB (Solna,Sweden)                                  |
| Yoshida 2019    | Chemiluminescence | Nasal exhalation                                | 3000 ml/min | Nasal olive | ▪ Sievers NOA-280i®, GE Analytical Instruments (Boulder, USA)         |

**Supplemental Table S2. Assessment of quality of studies (Newcastle-Ottawa scale).**

| <b>Study</b>       | <b>Adequate case definition</b> | <b>Representativeness of the cases</b> | <b>Selection of controls</b> | <b>Definition of controls</b> | <b>Comparability of cases and controls on the basis of the design or analysis*</b> | <b>Ascertainment of exposure</b> | <b>Same method of ascertainment for cases and controls</b> | <b>Non-response rate</b> | <b>Quality</b> |
|--------------------|---------------------------------|----------------------------------------|------------------------------|-------------------------------|------------------------------------------------------------------------------------|----------------------------------|------------------------------------------------------------|--------------------------|----------------|
| Alexandersson 2019 | ★                               | ★                                      | -                            | ★                             | -                                                                                  | ★                                | ★                                                          | ★                        | 6              |
| Arnal 1999         | ★                               | -                                      | -                            | ★                             | ★                                                                                  | ★                                | ★                                                          | ★                        | 6              |
| Asano 2008         | ★                               | ★                                      | -                            | ★                             | -                                                                                  | ★                                | ★                                                          | ★                        | 6              |
| Bae 2014**         | -                               | -                                      | -                            | -                             | -                                                                                  | -                                | -                                                          | -                        | NA             |
| Bommarito 2008     | ★                               | ★                                      | -                            | ★                             | -                                                                                  | ★                                | ★                                                          | ★                        | 6              |
| Frendø 2018        | ★                               | ★                                      | ★                            | ★                             | -                                                                                  | ★                                | ★                                                          | ★                        | 7              |
| Fu 2015            | ★                               | ★                                      | ★                            | ★                             | ★                                                                                  | ★                                | ★                                                          | ★                        | 8              |
| Fu 2017            | ★                               | ★                                      | ★                            | ★                             | ★                                                                                  | ★                                | ★                                                          | ★                        | 8              |
| Gilain 2002**      | -                               | -                                      | -                            | -                             | -                                                                                  | -                                | -                                                          | -                        | NA             |
| Guilemany 2009     | ★                               | ★                                      | ★                            | ★                             | -                                                                                  | ★                                | ★                                                          | ★                        | 7              |
| Gupta 2013         | ★                               | ★                                      | -                            | ★                             | -                                                                                  | ★                                | ★                                                          | ★                        | 6              |
| Heffler 2013       | ★                               | ★                                      | -                            | ★                             | -                                                                                  | ★                                | ★                                                          | ★                        | 6              |
| Jeong 2014         | ★                               | -                                      | -                            | ★                             | ★                                                                                  | ★                                | ★                                                          | ★                        | 6              |
| Lee 2015           | ★                               | ★                                      | ★                            | ★                             | -                                                                                  | ★                                | ★                                                          | ★                        | 7              |
| Lindenberg 1997    | ★                               | -                                      | -                            | ★                             | -                                                                                  | ★                                | ★                                                          | ★                        | 5              |
| Liu 2017           | ★                               | ★                                      | -                            | ★                             | -                                                                                  | ★                                | ★                                                          | ★                        | 6              |
| Noda 2012          | ★                               | -                                      | -                            | ★                             | -                                                                                  | ★                                | ★                                                          | ★                        | 5              |
| Ragab 2006         | ★                               | ★                                      | ★                            | ★                             | -                                                                                  | ★                                | ★                                                          | ★                        | 7              |
| Torretta 2015**    | -                               | -                                      | -                            | -                             | -                                                                                  | -                                | -                                                          | -                        | NA             |
| Tworek 2012        | ★                               | -                                      | -                            | ★                             | ★★                                                                                 | ★                                | ★                                                          | ★                        | 7              |
| Weschta 2008       | ★                               | ★                                      | ★                            | ★                             | -                                                                                  | ★                                | ★                                                          | ★                        | 7              |

|                 |   |   |   |   |    |   |   |   |   |
|-----------------|---|---|---|---|----|---|---|---|---|
| Williamson 2010 | ★ | ★ | - | ★ | ★★ | ★ | ★ | ★ | 8 |
| Yoshida 2019    | ★ | ★ | - | ★ | -  | ★ | ★ | ★ | 6 |

**NA: not assessed.**

\*A maximum of 2 stars can be allotted in this category: ★if enrolling controls matched to cases for age and sex; ★★ if enrolling controls matched to cases for any additional factor.

\*\*Only abstract available.

**Supplemental Table 3. Meta-regression analyses. Impact of major clinical and demographic variables on nasal nitric oxide (nNO) in cases and control subjects.**

|                                                | <b>Independent variable</b>          | <b>nNO</b>                          |
|------------------------------------------------|--------------------------------------|-------------------------------------|
| <b>CRS<sub>w</sub>NP vs. HEALTHY</b>           | % of males                           | Z-score: 0.115, P=0.908             |
|                                                | Age                                  | Z-score: 1.058, P=0.290             |
|                                                | Smoking                              | Z-score: 1.707, P=0.088             |
|                                                | Atopy                                | Z-score: 0.178, P=0.858             |
|                                                | Asthma                               | Z-score: 1.455, P=0.146             |
|                                                | Lund-Mackay CT score                 | Z-score: 0.596, P=0.551             |
|                                                | SNOT-22 score                        | N/A                                 |
|                                                | FEV <sub>1</sub> (% predicted)       | Z-score: 1.401, P=0.161             |
|                                                | FVC (% predicted)                    | N/A                                 |
|                                                | FEV <sub>1</sub> /FVC                | N/A                                 |
|                                                | Aspiration flow                      | <b>Z-score: -4.379, P&lt;0.0001</b> |
|                                                | <b>CRS<sub>s</sub>NP vs. HEALTHY</b> | % of males                          |
| Age                                            |                                      | Z-score: 0.484, P=0.629             |
| Smoking                                        |                                      | N/A                                 |
| Atopy                                          |                                      | Z-score: 1.011, P=0.312             |
| Asthma                                         |                                      | Z-score: 1.975, P=0.050             |
| Lund-Mackay CT score                           |                                      | <b>Z-score: -2.123, P=0.034</b>     |
| SNOT-22 score                                  |                                      | Z-score: -0.455, P=0.649            |
| FEV <sub>1</sub> (% predicted)                 |                                      | N/A                                 |
| FVC (% predicted)                              |                                      | N/A                                 |
| FEV <sub>1</sub> /FVC                          |                                      | N/A                                 |
| Aspiration flow                                |                                      | Z-score: -0.473, P=0.636            |
| <b>CRS<sub>w</sub>NP vs. CRS<sub>s</sub>NP</b> |                                      | % of males                          |
|                                                | Age                                  | Z-score: -0.831, P=0.406            |
|                                                | Smoking                              | Z-score: 1.576, P=0.115             |
|                                                | Atopy                                | Z-score: -0.723, P=0.469            |
|                                                | Asthma                               | Z-score: -1.437, P=0.151            |
|                                                | Lund-Mackay CT score                 | Z-score: 0.515, P=0.607             |
|                                                | SNOT-22 score                        | Z-score: -0.613, P=0.540            |
|                                                | FEV <sub>1</sub> (% predicted)       | N/A                                 |
|                                                | FVC (% predicted)                    | N/A                                 |
|                                                | FEV <sub>1</sub> /FVC                | N/A                                 |
|                                                | Aspiration flow                      | <b>Z-score: -4.100, P&lt;0.0001</b> |

**CRSwNP: chronic rhinosinusitis with nasal polyps; CRSsNP: chronic rhinosinusitis without nasal polyps; CT: computed tomography; SNOT-22: Sino-Nasal Outcome Test-22; FEV<sub>1</sub>: forced expiratory volume in 1 second; FVC: forced vital capacity; N/A: not assessed because of the limited number of studies reporting this covariate.**  
The overall effect was tested using Z-scores and significance was set at  $P < 0.05$ . Statistically significant results are shown in bold.

**Supplemental Figure 1. Funnel plot of effect size vs. precision (1/standard error) for studies evaluating nasal nitric oxide (nNO) in patients with chronic rhinosinusitis with nasal polyps (CRSwNP) and healthy controls.**

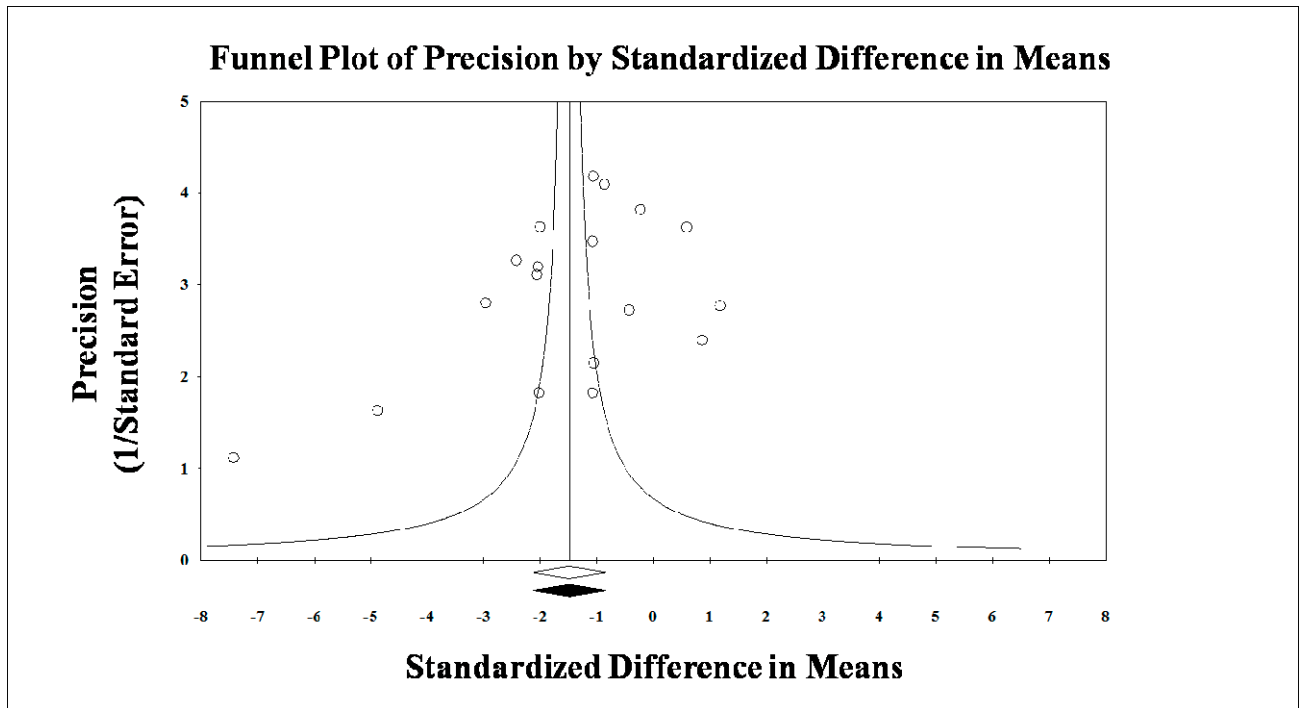

Observed studies and effect size are represented by empty circles and empty square. Imputed studies and adjusted effect size are represented by black circles and black square.

|                                     |                                                    |           |
|-------------------------------------|----------------------------------------------------|-----------|
| <b>Egger's regression intercept</b> | Intercept                                          | -5.24799  |
|                                     | Standard error                                     | 3.13557   |
|                                     | 95% lower limit                                    | -11.89511 |
|                                     | 95% upper limit                                    | 1.39913   |
|                                     | t-value                                            | 1.67369   |
|                                     | P value                                            | 0.11362   |
| <b>Begg and Mazumdar</b>            | <b>Kendall's S statistic (P-Q)</b>                 | -39.00000 |
|                                     | <b>Kendall's tau without continuity correction</b> |           |
|                                     | tau                                                | -0.25490  |
|                                     | Z-value for tau                                    | 1.47723   |
|                                     | P-value                                            | 0.13961   |
|                                     | <b>Kendall's tau with continuity correction</b>    |           |
| tau                                 | -0.24837                                           |           |
| Z-value for tau                     | 1.43935                                            |           |
| P-value                             | 0.15005                                            |           |

| <b>Duvall and Tweedie's trim and fill</b> | Studies trimmed | Point estimate | Lower limit | Upper limit | <b>Q value</b> |
|-------------------------------------------|-----------------|----------------|-------------|-------------|----------------|
| Observed values                           | -               | -1.495         | -2.135      | -0.854      | 270.216        |
| Adjusted values (on the left)             | 0               | -1.495         | -2.135      | -0.854      | 270.216        |
| Adjusted values (on the right)            | 0               | -1.495         | -2.135      | -0.854      | 270.216        |



**Supplemental Figure 2. Funnel plot of effect size vs. precision (1/standard error) for studies evaluating nasal nitric oxide (nNO) in patients with chronic rhinosinusitis without nasal polyps (CRSsNP) and healthy controls.**

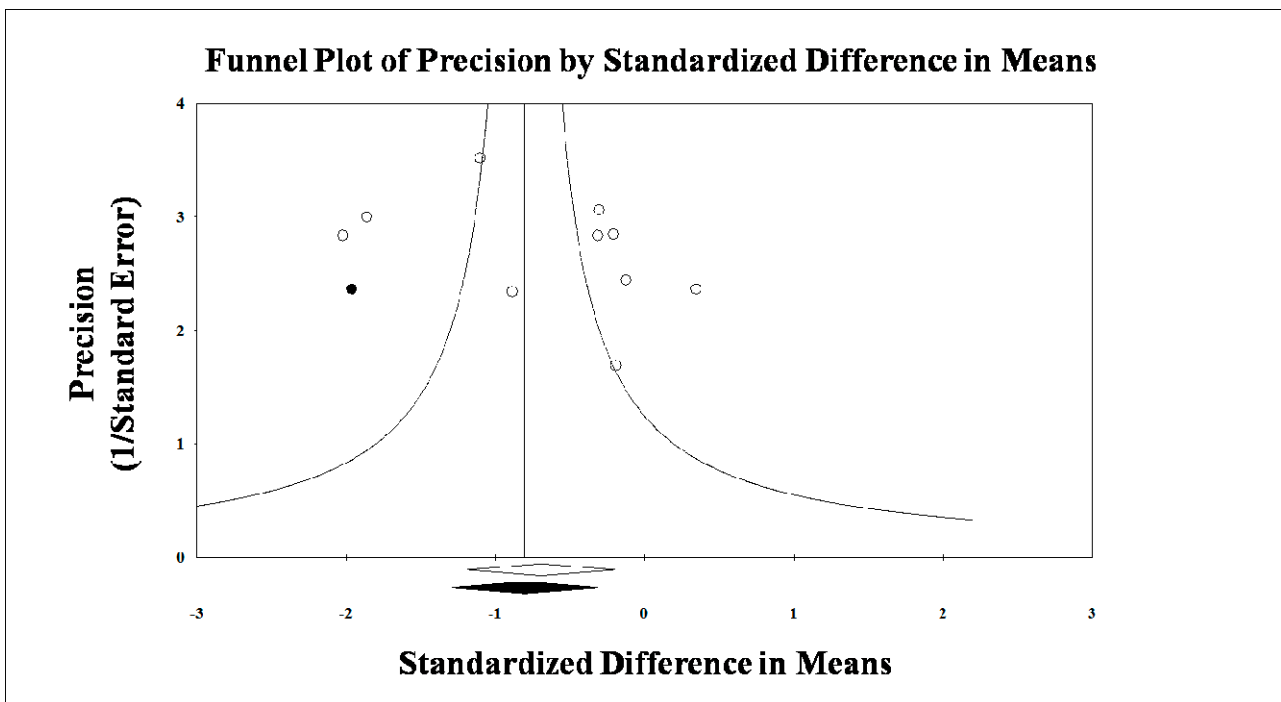

Observed studies and effect size are represented by empty circles and empty square. Imputed studies and adjusted effect size are represented by black circles and black square.

|                                     |                                                    |          |
|-------------------------------------|----------------------------------------------------|----------|
| <b>Egger's regression intercept</b> | Intercept                                          | 4.45525  |
|                                     | Standard error                                     | 3.79837  |
|                                     | 95% lower limit                                    | -4.30382 |
|                                     | 95% upper limit                                    | 13.21431 |
|                                     | t-value                                            | 1.17294  |
|                                     | P value                                            | 0.27456  |
| <b>Begg and Mazumdar</b>            | <b>Kendall's S statistic (P-Q)</b>                 | 7.00000  |
|                                     | <b>Kendall's tau without continuity correction</b> |          |
|                                     | tau                                                | 0.15556  |
|                                     | Z-value for tau                                    | 0.62610  |
|                                     | P-value                                            | 0.53125  |
|                                     | <b>Kendall's tau with continuity correction</b>    |          |
| tau                                 | 0.13333                                            |          |
| Z-value for tau                     | 0.53666                                            |          |
| P-value                             | 0.59151                                            |          |

| <b>Duvall and Tweedie's trim and fill</b> | Studies trimmed | Point estimate | Lower limit | Upper limit | <b>Q value</b> |
|-------------------------------------------|-----------------|----------------|-------------|-------------|----------------|
| Observed values                           | -               | -0.696         | -1.189      | -0.202      | 41.214         |
| Adjusted values (on the left)             | 1               | -0.804         | -1.294      | -0.315      | 48.502         |
| Adjusted values (on the right)            | 0               | -0.696         | -1.189      | -0.202      | 41.214         |

**Supplemental Figure 3. Funnel plot of effect size vs. precision (1/standard error) for studies evaluating nasal nitric oxide (nNO) in patients with chronic rhinosinusitis with nasal polyps (CRSwNP) and in control subjects with chronic rhinosinusitis without nasal polyps (CRSsNP).**

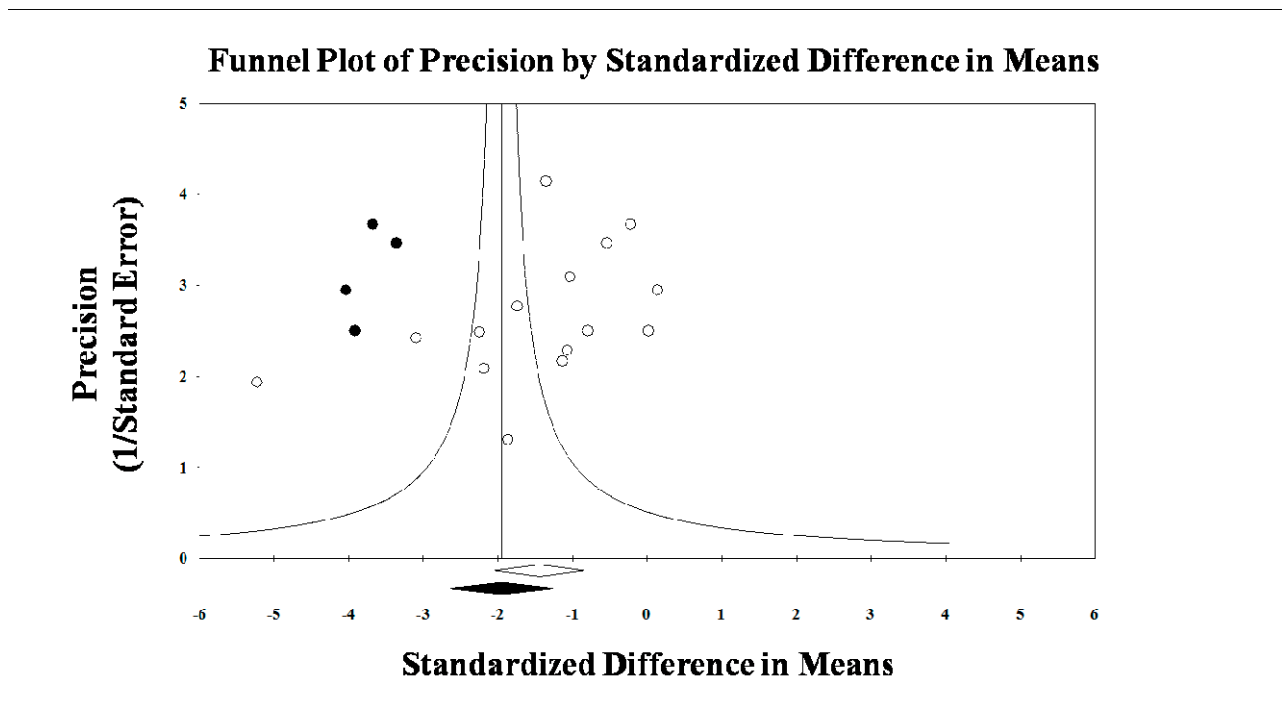

Observed studies and effect size are represented by empty circles and empty square. Imputed studies and adjusted effect size are represented by black circles and black square.

|                                     |                                                    |           |
|-------------------------------------|----------------------------------------------------|-----------|
| <b>Egger's regression intercept</b> | Intercept                                          | -5.51859  |
|                                     | Standard error                                     | 2.94419   |
|                                     | 95% lower limit                                    | -11.87912 |
|                                     | 95% upper limit                                    | 0.84193   |
|                                     | t-value                                            | 1.87440   |
|                                     | P value                                            | 0.08352   |
| <b>Begg and Mazumdar</b>            | <b>Kendall's S statistic (P-Q)</b>                 | -47.0000  |
|                                     | <b>Kendall's tau without continuity correction</b> |           |
|                                     | tau                                                | -0.44762  |
|                                     | Z-value for tau                                    | 2.32590   |
|                                     | P-value                                            | 0.02002   |
|                                     | <b>Kendall's tau with continuity correction</b>    |           |
| tau                                 | -0.43810                                           |           |
| Z-value for tau                     | 2.27641                                            |           |
| P-value                             | 0.02282                                            |           |

| <b>Duvall and Tweedie's trim and fill</b> | Studies trimmed | Point estimate | Lower limit | Upper limit | <b>Q value</b> |
|-------------------------------------------|-----------------|----------------|-------------|-------------|----------------|
| Observed values                           | -               | -1.448         | -2.046      | -0.850      | 140.342        |
| Adjusted values (on the left)             | 4               | -1.955         | -2.264      | -1.268      | 328.771        |
| Adjusted values (on the right)            | 0               | -1.448         | -2.046      | -0.850      | 140.342        |
